# Supplementary material for: Hypoxic Burden Calculation in Patients with Obstructive Sleep Apnea Diagnosed by Peripheral Arterial Tonometry: Diagnostic Accuracy and Clinical Implications
Source: Research Square preprint supplement (doi:10.21203/rs.3.rs-8282627/v1), 2025-12-11
Supplement: Supplementary file 1 [file a031b4fd32f70a02096de8cb.docx]

**Additional file 1: Supplementary Methods**

**Supplementary Methods 1. Step-by-step Algorithm for HB Computation** (Data sources, SpO₂ pre-processing, event-based and second-by-second HB, implementation, and QC)

**1. Step‑by‑step Algorithm for HB Computation**

**1.1 Data sources and definitions**

**Signals**: (a) Peripheral oxygen saturation (SpO₂) recorded overnight; (b) Respiratory event (RE) annotations labeled as apnoea or hypopnoea per AASM rules; (c) Optional sleep staging to define total sleep time (TST) and exclude wake epochs.

**Sampling**: Raw device sampling ≥8–10 Hz before vendor filtering; analysis resampled to 1 Hz.

**Units**: HB is expressed as **%·min/h** (percentage‑minutes of desaturation per hour of effective sleep). Areas are first computed in **%·s** and converted to %·min/h.

**1.2 Time base and t = 0 (“point zero”)**

Convert device timestamps to an integer second counter.

Define **t = 0** as the earliest of: (i) first scored sleep epoch, or (ii) explicit device marker (if present). If staging is unavailable, use the recording start after basic Q and approximate TST as the valid analysis window duration after artefact exclusion.

Express all times relative to **t = 0**.

**1.3 Analysis window and TST**

**Sleep period**: [t = 0, last scored sleep epoch].

**Validity mask**: seconds retained after artefact handling (Valid(t) = 1; see §2.5).

**TST (hours)**: TST = (Σ Valid(t)) / 3600.

**2. Pre‑processing of SpO₂**

**Resampling**: resample to 1 Hz (nearest or linear interpolation after QC).

**Physiological range**: values <50% or >100% are set missing.

**Artefact repair**: gaps ≤5 s linearly interpolated; longer gaps remain missing and are excluded (Valid(t) = 0).

**Optional smoothing**: 3–5 s moving median (default: median, 3 s) applied to reduce single‑sample spikes without blunting nadirs.

**Validity flags**: Valid(t) = 1 iff SpO₂ available post‑QC; otherwise 0.

**Edge cases**: clock roll‑over across midnight; duplicate timestamps; monotone missing segments ≥30 s near device detachments (left missing).

**3. Event‑based HB (HB_event — primary index)**

**3.1 Event eligibility & windows**

Candidate REs are those with AASM‑concordant annotations (apnoea or hypopnoea).

**Baseline window**: [−30 s, −10 s] before the scored event onset ts_i.

**Recovery window**: extend forward from ts_i up to ts_i + 120 s or until recovery is detected (§3.3).

**3.2 Baseline saturation**

S_base,i = median{ SpO₂(t) : t ∈ [ts_i − 30, ts_i − 10], Valid(t) = 1 }.

If <50% of baseline window is valid, mark event **ineligible**.

**3.3 Recovery detection**

Define recovery when SpO₂(t) returns to within **1%** of S_base,i and remains there for ≥2 consecutive seconds (hysteresis to avoid chatter). If no recovery by +120 s, truncate at +120 s.

**3.4 Instantaneous deficit and minimum depth**

Per‑second deficit: D_i(t) = max(0, S_base,i − SpO₂(t)) for t ∈ [ts_i, t_rec,i].

**Minimum depth rule**: discard event if the **peak** desaturation < **3%** below baseline (i.e., max_t D_i(t) < 3).

**3.5 Event area and aggregation**

Event area in **%·s**: A_i = Σ_{t = ts_i}^{t_rec,i} D_i(t).

**HB_event (%·min/h)**: HB_event = ( Σ_i A_i / 60 ) / TST_hours.

**3.6 Quality control (QC) outputs**

Counts: scored REs, retained events, excluded events (reasons: insufficient baseline, <3% depth, missing data >50% in window, truncated recovery).

Per‑night summaries: median baseline SpO₂, median nadir, median event duration.

**Note**: Primary and secondary analyses use **HB_event** exclusively. The continuous algorithm (§4) is documented for reproducibility but was **not** applied to the analytic dataset.

**4. Second‑by‑second HB (HB_sec — documented, not used in analyses)**

**4.1 Dynamic baseline**

B(t) = 95th percentile of SpO₂ in a rolling **5‑min** window centered at t (use asymmetric window near edges).

**4.2 Continuous deficit**

C(t) = max(0, B(t) − SpO₂(t)).

**4.3 Optional threshold**

Enforce C(t) ≥ 3% (optional) to align with desaturation criteria; default **off** for sensitivity analyses.

**4.4 Integration and scaling**

HB_sec (%·min/h) = ( Σ_{t} C(t) / 60 ) / TST_hours, restricted to Valid(t) = 1 during sleep.

**4.5 Sensitivity analyses**

Alternative baselines: 90th–98th percentiles; rolling windows 3–10 min.

Alternative thresholds: 2–4%.

**5. Implementation details (Stata to Python)**

**5.1 Development in Stata:** Event loops with recovery detection and area summation using rangestat/by‑group operations; integer‑second time base; robust handling of midnight roll‑over.

**5.2 Translation to Python:** Vectorized Pandas/Numpy implementation with boolean masks for Valid(t), rolling quantiles (bottleneck/fallback); unit tests to match Stata outputs (absolute/relative tolerance ≤1e‑6 on areas and HB indices).

**5.3 Reproducibility artefacts**

**Versioning**: semantic versions for code and JSON config.

**Config** (JSON): sampling Hz, baseline/recovery windows, smoothing kernel, min depth, max recovery horizon, thresholds, QC toggles.

**QC logs** (CSV): per‑night counters, event‑level reasons for exclusion, timing truncations, and missingness rates.

**6. Outputs**

**Primary indices**: HB_event (%·min/h); HB_sec (%·min/h, if computed).

**Auxiliary**: A_total (%·s), C_total (%·s, if continuous), TST (h).

**Counts**: n_scored, n_retained, n_excluded (by reason).

**Stratified** (optional): position‑specific HB (supine, right, left, prone) using synchronized body‑position channels.

**Per‑event table**: start/end times, baseline, nadir, max depth, duration, area, position/stage label.

**7. Interpretation**

Higher HB indicates greater integrated nocturnal hypoxaemic load.

**Event‑based HB** captures desaturations tied to scored REs; more specific to OSA pathophysiology under AASM rules.

**Second‑by‑second HB** captures the full hypoxaemic profile (may include unscored fluctuations, e.g., non‑respiratory dips), useful for sensitivity analyses.

**8. Parameter defaults and justifications**

| **Parameter** | **Default** | **Rationale** |
| --- | --- | --- |
| Resampling | 1 Hz | Align with second‑by‑second event integration; avoids aliasing of nadirs |
| Baseline window | −30 to −10 s | Stable pre‑event plateau while avoiding immediate pre‑onset slope |
| Recovery horizon | 120 s | Captures typical re‑oxygenation; prevents indefinite tails |
| Recovery criterion | within 1% of baseline for ≥2 s | Hysteresis to avoid chatter |
| Min depth | 3% | Aligns with AASM desaturation criterion |
| Interp. of gaps | ≤5 s | Small gaps unlikely to bias areas; longer gaps excluded |
| Smoothing | 3‑s median | Reduces single‑sample spikes while preserving nadirs |

**9. Mathematical definitions (explicit)**

- **Event area**: (A_i = \sum_{t = t_{s,i}}^{t_{rec,i}} \max{0, S_{base,i} - S(t)}) (units: %·s)
- **HB_event**: (HB_{event} = \frac{\sum_i A_i / 60}{TST; (h)}) (units: %·min/h)
- **Continuous baseline**: (B(t) = Q_{0.95}\big({S(u) : u \in [t-150, t+150]}\big))
- **Continuous burden**: (HB_{sec} = \frac{\sum_t \max{0, B(t) - S(t)}/60}{TST; (h)})

**10. Pseudocode (event‑based, simplified)**

# Inputs: SpO2[sec], RE list with (ts, te), Valid[sec]

for each event i:

if valid_fraction(SpO2 in [ts-30, ts-10]) < 0.5: exclude; continue

S_base = median(SpO2[ts-30:ts-10])

t_end = min(ts + 120, detect_recovery(SpO2, S_base))

D = clip(S_base - SpO2[ts:t_end], lower=0)

if max(D) < 3: exclude; continue

A_i = sum(D)

HB_event = (sum(A_i)/60) / TST_hours

**11. Quality‑control thresholds and reports**

Event exclusion reasons logged at event‑level.

Night‑level flags: (i) missingness >20% during sleep; (ii) <4 retained events; (iii) TST < 240 min (study exclusion, per protocol).

Position channels audited: % of TST with valid position; if <10% in non‑supine, mark positional HB as unreliable.

**12. File I/O and artefacts**

**Inputs**: vendor‑exported CSV/XLSX with second‑by‑second data; optional event and position channels; optional stage channel.

**Outputs**: (i) per‑event table; (ii) per‑night summary; (iii) optional per‑position HB summary; (iv) QC log.

**Metadata**: code version, config JSON snapshot, device firmware/software versions, oximetry averaging time.

**13. Reproducibility & versioning**

Analyses run with fixed configuration snapshots; all thresholds and windows declared above.

Cross‑validated Stata→Python parity using unit tests on canonical samples; absolute/relative errors ≤1e‑6 on areas and ≤1e‑4 on HB indices.

**14. Notes on generalizability and altitude**

The algorithm is device‑agnostic **if** inputs provide second‑by‑second SpO₂ and synchronized annotations; cut‑off values may shift with different oximetry dynamics or averaging.

At moderate altitude (≈1,500–2,600 m a.s.l.), lower baseline SpO₂ may inflate absolute HB; report local reference percentiles alongside thresholds.

**15. Worked example (unit consistency)**

Example event: S_base = 95%, nadir 88%, duration 19 s.

Triangle approximation area ≈ ½ × 7% × 19 s = 66.5 %·s (if approximated triangular). With full second‑wise integration, area equals Σ per‑second deficits.

Single‑night aggregation: if ΣA_i = 35,000 %·s and TST = 6.0 h → HB_event = (35,000/60)/6 = 97.2 %·min/h.

**16. Declarations for this Supplement**

**Primary index used**: HB_event.

**Continuous index**: documented, not applied to this cohort’s results.

**Manual review**: index events edited per COMPASS/AASM rules prior to HB computation; REs with spurious 3% dips removed as a strict prerequisite

**Supplementary Note — Corrected ODI3% Events**

.For the corrected computation of ODI3% events, each additional desaturation was mapped to a fixed-duration element to align with HB units. Specifically, we assumed a constant duration of 10 s for each event and weighted it by the desaturation depth (in % below baseline). The nightly increment was then expressed in %·min/h as:


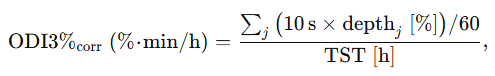


where depthj\mathrm{depth}_jdepthj​ is the event’s SpO₂ drop in percentage points relative to its baseline and TST is the total sleep time in hours.
